# Supplementary material
Source: ML conference proceedings conference paper supplement (https://openaccess.thecvf.com/content/CVPR2026/html/Wu_Solving_Minimal_Problems_CVPR_2026_paper.html)
Supplement: Supplementary file 1 [file Wu_Solving_Minimal_Problems_CVPR_2026_supplemental.pdf]

# Supplementary Material

## Solving Minimal Problems Without Matrix Inversion Using FFT-Based Interpolation

Haidong Wu      Snehal Bhayani      Janne Heikkilä  
 Center for Machine Vision and Signal Analysis  
 University of Oulu, Oulu, Finland

Haidong.Wu@oulu.fi, Snehal.Bhayani@oulu.fi, Janne.Heikkila@oulu.fi

### S1. Resultant matrix sizes and runtime statistics

Table S1 summarizes the resultant matrix sizes used in our solver for all tested minimal problems, along with the average runtime per instance and the number of roots returned. These sizes correspond to the dimensions of the matrices  $M(x_1)$  constructed from the hidden variable formulation described in the main paper. As discussed in Section 4, the runtime of our solver is influenced primarily by the size of the resultant matrix and the number of roots that require evaluation and back-substitution.

The observations indicate that for problems with a similar number of roots, the runtime is largely determined by the size of the resultant matrix. For example, our solver returns 24 roots for the Rel. pose  $E+f\lambda$  7pt, Abs. pose refractive P5P, and Abs. pose quivers problems. However, the latter two are substantially slower because their resultant matrices are significantly larger ( $40 \times 40$ ) compared with that of the Rel. pose  $E+f\lambda$  7pt problem ( $20 \times 20$ ). Likewise, our solver returns a comparable number of roots for the Rel. pose  $f+E+f$  6pt problem and the Abs. pose P4Pfr (elim.  $f$ ) problem, but the latter exhibits a longer runtime because its resultant matrix is larger ( $20 \times 20$  vs.  $10 \times 10$ ). Overall, these comparisons demonstrate that the size of the resultant matrix is the dominant factor governing the computational cost of our solver.

### S2. Runtime breakdown of the proposed solver

Table S2 shows the runtime breakdown of the proposed solver for all tested minimal problems. The reported values correspond to the fraction of the total runtime spent in determinant coefficient recovery, polynomial root solving, and recovering remaining variables. The results indicate that determinant coefficient recovery and recovering remaining variables together dominate the overall computation. In many cases, recovering remaining variables consti-

tutes the largest portion of the runtime. In contrast, polynomial root solving consistently requires only a small fraction of the total runtime. Other steps incur negligible runtime and are therefore omitted.

---

#### Algorithm S1 Offline Stage

---

**Input:** Input polynomial system from a minimal problem

**Output:** Hidden variable  $x_1$ ; resultant matrix  $M(x_1)$ ; degree  $k$  of  $\det(M(x_1))$ ; number  $r$  of real solutions; valid row-column pair  $(i, j)$ ; and index pairs  $(j_1, j_2)$  for unhidden variables

- 1: Determine  $x_1$ , construct  $M(x_1)$ , and compute the degree  $k$  using the sparse resultant method [1].
  - 2: Randomize input coefficients and compute  $r$  using a Gröbner-basis.
  - 3: Find a valid row-column pair  $(i, j)$  as follows:
  - 4: **for**  $i = 1$  to  $N$  **do**
  - 5:     **for**  $j = 1$  to  $N$  **do**
  - 6:         Remove row  $i$  and column  $j$  from  $M(x_1)$  to obtain submatrix  $M^{(i,j)}(x_1)$
  - 7:         Let  $G$  be  $\gcd(\det(M(x_1)), \det(M^{(i,j)}(x_1)))$
  - 8:         **if**  $G$  is a constant **then**
  - 9:             Save  $(i, j)$  as a valid row-column pair
  - 10:         **end if**
  - 11:     **end for**
  - 12: **end for**
  - 13: Find index pairs  $(j_1, j_2)$  for each unhidden variable  $x_i$  ( $i \geq 2$ ):
  - 14: **for**  $x_i$  in  $\{x_2, \dots, x_n\}$  **do**
  - 15:     Find  $(j_1, j_2)$  such that  $\deg(\mathbf{v}'[j_1], x_i) = \deg(\mathbf{v}'[j_2], x_i) + 1$
  - 16:     **if**  $\mathbf{v}'[j_1]$  and  $\mathbf{v}'[j_2]$  differ only in  $x_i$  **then**
  - 17:         Save  $(j_1, j_2)$  for computing the remaining variables, and continue to the next  $x_i$ .
  - 18:     **end if**
  - 19: **end for**
-

Table S1. Matrix sizes, runtimes, and root counts of our solver across different minimal problems. Values marked with \* denote results before filtering spurious roots.

| #  | Problem                                                  | Our       |       |             |
|----|----------------------------------------------------------|-----------|-------|-------------|
|    |                                                          | time (ms) | roots | matrix size |
| 1  | Rel. pose F+ $\lambda$ 8pt (8 sols)                      | 0.086     | 8     | 4 × 4       |
| 2  | Rel. pose E+f 6pt (9 sols)                               | 0.154     | 9     | 7 × 7       |
| 3  | Rel. pose f+E+f 6pt (15 sols)                            | 0.287     | 15    | 10 × 10     |
| 4  | Stitching f $\lambda$ +R+f $\lambda$ 3pt (18 sols)       | 0.213     | 18    | 6 × 6       |
| 5  | Rel. pose E+f $\lambda$ 7pt (elim. $\lambda$ ) (19 sols) | 0.417     | 19    | 35 × 35     |
| 6  | Triangulation from satellite im. (27 sols)               | 2.923*    | 27    | 34 × 34     |
| 7  | Optimal PnP (Hesch) (27 sols)                            | 2.773*    | 27    | 33 × 33     |
| 8  | Rolling shutter pose (8 sols)                            | 1.526*    | 11    | 35 × 35     |
| 9  | Abs. Pose P4Pfr (elim. f) (12 sols)                      | 0.773*    | 14    | 20 × 20     |
| 10 | Rel. pose E+f $\lambda$ 7pt (19 sols)                    | 1.254*    | 24    | 20 × 20     |
| 11 | Abs. pose refractive P5P (16 sols)                       | 5.863*    | 24    | 40 × 40     |
| 12 | Abs. pose quivers (20 sols)                              | 3.221*    | 24    | 40 × 40     |
| 13 | Optimal PnP (Cayley) (40 sols)                           | 7.442*    | 43    | 45 × 45     |
| 14 | Rel. pose $\lambda_1$ +F+ $\lambda_2$ 9pt (24 sols)      | 9.520*    | 36    | 45 × 45     |

Table S2. Runtime breakdown of the proposed solver. Each value indicates the fraction of total runtime spent in the corresponding step.

| #  | Problem                                        | Our                  |                         |                                |
|----|------------------------------------------------|----------------------|-------------------------|--------------------------------|
|    |                                                | Determinant recovery | Polynomial root solving | Recovering remaining variables |
| 1  | Rel. pose F+ $\lambda$ 8pt                     | 0.303                | 0.213                   | 0.484                          |
| 2  | Rel. pose E+f 6pt                              | 0.462                | 0.126                   | 0.412                          |
| 3  | Rel. pose f+E+f 6pt                            | 0.454                | 0.137                   | 0.409                          |
| 4  | Stitching f $\lambda$ +R+f $\lambda$ 3pt       | 0.148                | 0.152                   | 0.700                          |
| 5  | Rel. pose E+f $\lambda$ 7pt (elim. $\lambda$ ) | 0.458                | 0.120                   | 0.422                          |
| 6  | Triangulation from satellite im.               | 0.428                | 0.036                   | 0.536                          |
| 7  | Optimal PnP (Hesch)                            | 0.434                | 0.042                   | 0.524                          |
| 8  | Rolling shutter pose                           | 0.390                | 0.023                   | 0.587                          |
| 9  | Abs. Pose P4Pfr (elim. f)                      | 0.393                | 0.050                   | 0.557                          |
| 10 | Rel. pose E+f $\lambda$ 7pt                    | 0.371                | 0.067                   | 0.562                          |
| 11 | Abs. pose refractive P5P                       | 0.358                | 0.021                   | 0.621                          |
| 12 | Abs. pose quivers                              | 0.315                | 0.027                   | 0.658                          |
| 13 | Optimal PnP (Cayley)                           | 0.490                | 0.030                   | 0.480                          |
| 14 | Rel. pose $\lambda_1$ +F+ $\lambda_2$ 9pt      | 0.478                | 0.024                   | 0.498                          |

## References

- [1] Snehal Bhayani, Zuzana Kukelova, and Janne Heikkilä. Computing stable resultant-based minimal solvers by hiding a variable. In *2020 25th International Conference on Pattern Recognition (ICPR)*, pages 6104–6111. IEEE, 2021. 1
